# Supplementary material for: Ventral hippocampal interneurons govern extinction and relapse of contextual associations
Source: PubMed Central journal article supplement — Cell Rep. Author manuscript; Available in PMC 2024 Dec 23. (PMC11665204; doi:10.1016/j.celrep.2024.114880), 2024-10-18
Supplement: NIHMS2038864-supplement-1.pdf [file NIHMS2038864-supplement-1.pdf]

**Cell Reports, Volume 43**

**Supplemental information**

**Ventral hippocampal interneurons govern extinction  
and relapse of contextual associations**

**Anthony F. Lacagnina, Tri N. Dong, Rasika R. Iyer, Leonie F. Boesch, Saqib Khan, Mazen K. Mohamed, and Roger L. Clem**

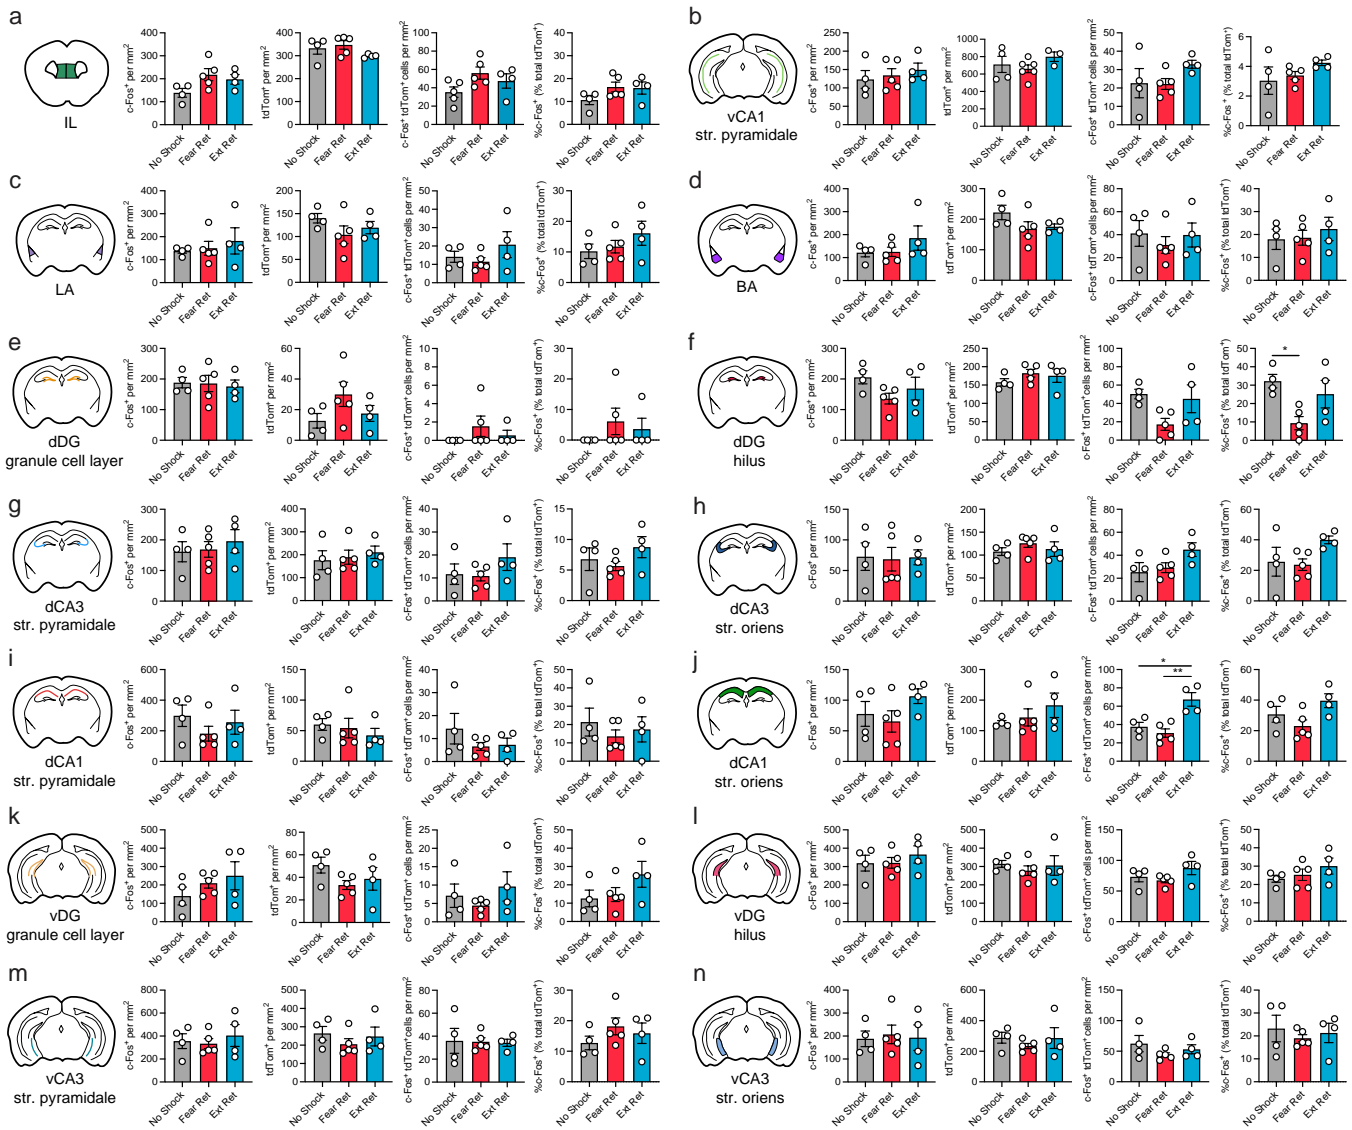

**Supplementary Figure 1. Additional regions of interest for c-Fos-based analysis of general and SST-IN-specific following fear or extinction retrieval, related to Fig. 1. (a-n)** Quantification of c-Fos<sup>+</sup> cell density, tdTom<sup>+</sup> cell density, c-Fos<sup>+</sup> tdTom<sup>+</sup> cell density, and c-Fos<sup>+</sup> (% total tdTom<sup>+</sup> cells) from (a) infralimbic medial prefrontal cortex (IL), (b) vCA1 str. pyramidale, (c) lateral amygdala (LA), (d) basal amygdala (BA), (e) dorsal dentate gyrus (dDG) granule cell layer, (f) dDG hilus, (g) dorsal CA3 str. pyramidale, (h) dorsal CA3 str. oriens, (i) dCA1 str. pyramidale, (j) dCA1 str. oriens, (k) vDG granule cell layer, (l) vDG hilus, (m) vCA3 str. pyramidale and (n) vCA3 str. oriens related to Fig. 1a-f analyzed by one-way ANOVA. c-Fos<sup>+</sup> (% total tdTom<sup>+</sup> cells) from dDG hilus:  $F_{(2, 10)} = 5.72$ ,  $p < 0.05$ . c-Fos<sup>+</sup> tdTom<sup>+</sup> cell density from dCA1 str. oriens:  $F_{(2, 10)} = 12.0$ ,  $p < 0.01$ . No Shock:  $n = 4$ ; Fear Ret:  $n = 5$ ; Ext Ret:  $n = 4$ . \*  $p < 0.05$ , \*\* -  $p < 0.01$  Tukey's post-hoc test.

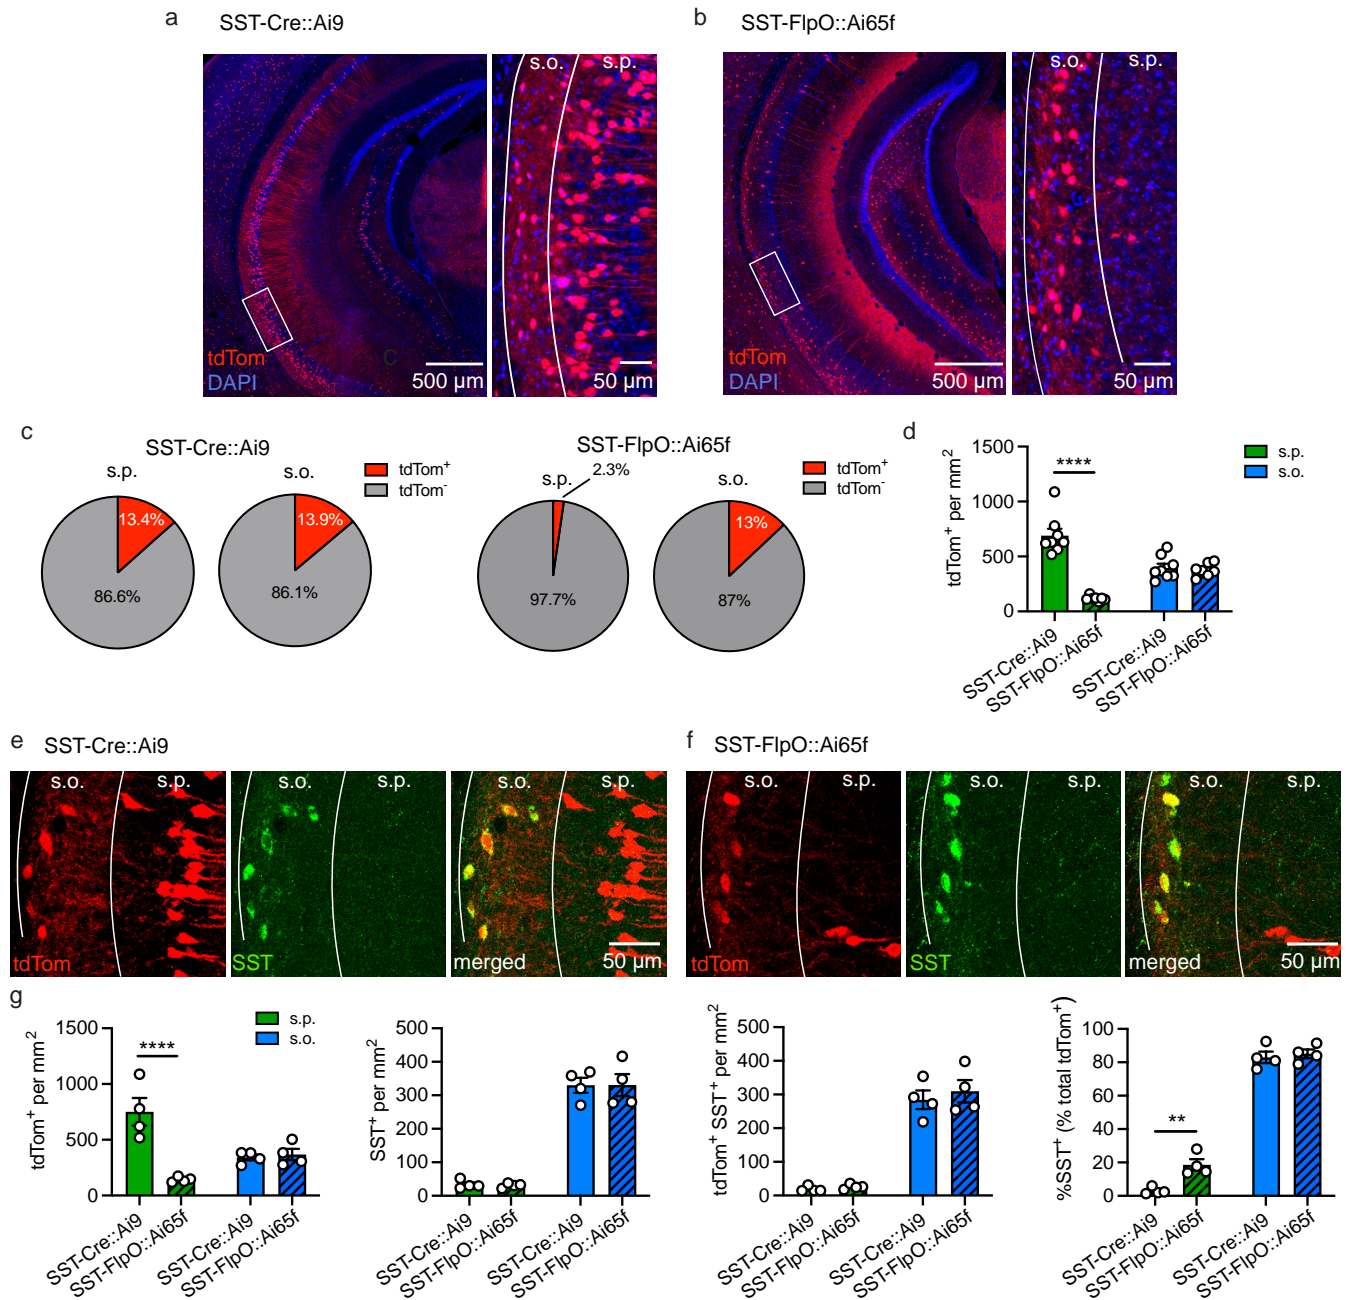

**Supplementary Figure 2. Comparison of recombination selectivity in SST-Cre versus SST-FlpO mice, related to Fig. 1. (a-b):** Representative image of vCA1 in (a) SST-Cre::Ai9 and (b) SST-FlpO::Ai65f mice. Solid white box indicates region of magnification in right panel. **(c)** tdTom<sup>+</sup> and tdTom<sup>-</sup> cells as a proportion of DAPI<sup>+</sup> cells in vCA1 s.p. and s.o. layers. **(d)** tdTom<sup>+</sup> cell density in vCA1 s.p. and s.o. layers analyzed by two-way ANOVA.  $F_{(1, 26)} = 45.2$ ,  $p < 0.0001$ . **(e-f)** Representative image of SST immunolabeling and tdTom expression in vCA1 of (e) SST-Cre::Ai9 and (f) SST-FlpO::Ai65f mice. **(g)** tdTom<sup>+</sup>, SST<sup>+</sup>, tdTom<sup>+</sup> SST<sup>+</sup> cell density, and SST<sup>+</sup> cells (% of tdTom<sup>+</sup> cells) in vCA1 s.p. and s.o., analyzed by two-way ANOVA. tdTom<sup>+</sup> density:  $F_{(1, 12)} = 21.4$ ,  $p < 0.001$ . SST<sup>+</sup> (% total tdTom<sup>+</sup>):  $F_{(1, 12)} = 5.12$ ,  $p < 0.05$ . **a-d:** SST-Cre::Ai9:  $n = 8$ ; SST-FlpO::Ai65f:  $n = 7$ . **e-g:** SST-Cre::Ai9:  $n = 4$ ; SST-FlpO::Ai65f:  $n = 4$ . \*\* -  $p < 0.001$ , \*\*\*\* -  $p < 0.0001$  by Šidák's post hoc test.

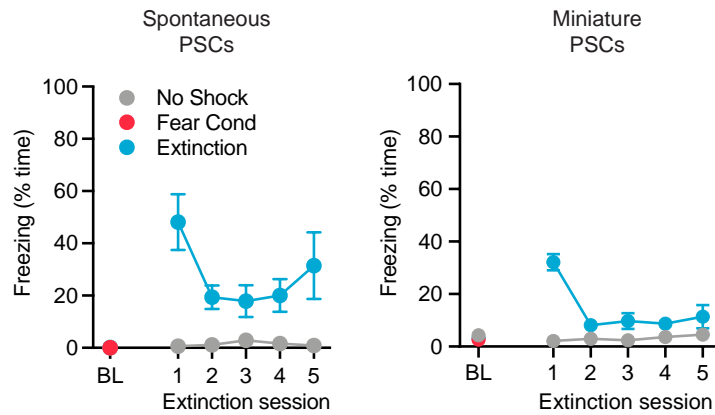

**Supplementary Figure 3. Freezing levels for mice used in synaptic electrophysiology experiments, related to Fig. 2.** Freezing was quantified during the pre-shock baseline period during contextual fear conditioning and during each 5 min extinction session. Spontaneous postsynaptic currents (PSCs); No Shock:  $n = 6$  mice; Fear Cond:  $n = 4$  mice; Extinction:  $n = 5$  mice. Miniature PSCs; No Shock:  $n = 5$  mice; Fear Cond:  $n = 5$  mice; Extinction:  $n = 3$  mice.

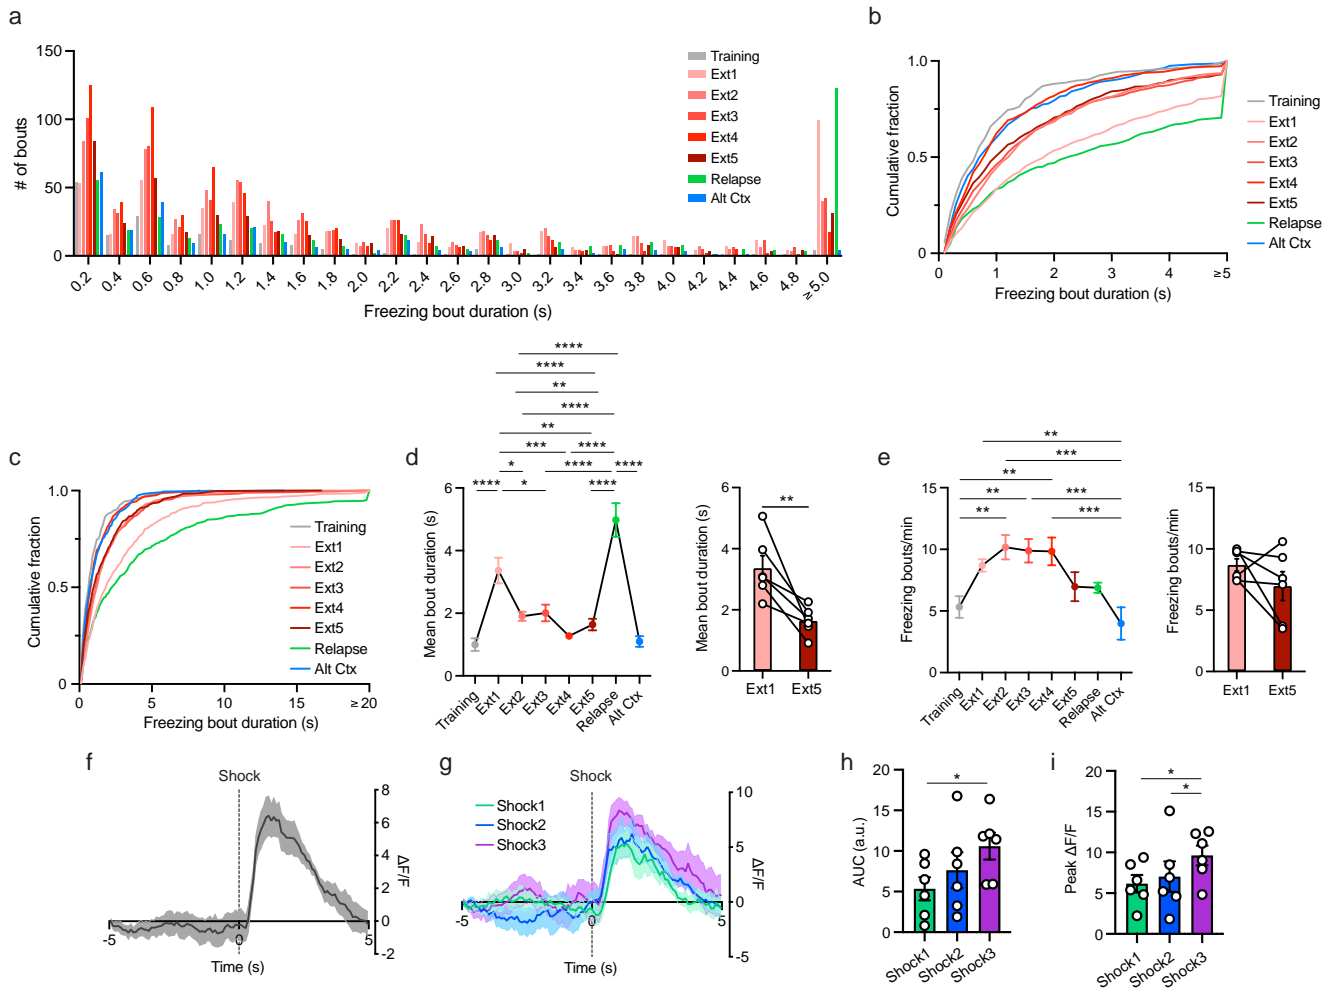

**Supplementary Figure 4. Freezing bout analysis and vCA1 SST-IN shock-related  $\text{Ca}^{2+}$  responses, related to Fig. 3. (a-b)** Histogram (a) and cumulative distribution (b) of freezing bout length across behavioral sessions in Fig. 3, with bouts  $\geq 5$  s as the maximum value. **(c)** Same as (b), but with bouts  $\geq 20$  s as the maximum value. **(d)** Mean bout duration across behavioral sessions (left), with break-out for comparison of extinction sessions 1 and 5 for individual animals (right), analyzed by one-way repeated-measures ANOVA.  $F_{(7, 35)} = 23.6$ ,  $p < 0.0001$ . **(e)** Freezing bout frequency across behavioral session (left), with break-out for comparison of extinction sessions 1 and 5 for individual animals, analyzed by one-way repeated-measures ANOVA.  $F_{(7, 35)} = 8.22$ ,  $p < 0.0001$ . **(f)** Mean  $\Delta F/F$  from  $\pm 5$  s of shock responses from during contextual fear conditioning. **(g)**  $\Delta F/F$  from  $\pm 5$  s of individual shocks. **(h-i)** Quantification of area under the curve (AUC) (h) and peak amplitude (i) of mean  $\Delta F/F$  from 0 to 2 s of each shock onset, as analyzed by one-way RM ANOVA. AUC:  $F_{(2, 10)} = 4.95$ ,  $p < 0.05$ . Peak:  $F_{(2, 10)} = 7.26$ ,  $p < 0.05$ .  $n = 6$ . \*  $p < 0.05$ , \*\*  $p < 0.01$ , \*\*\*  $p < 0.001$  by Tukey's post-hoc test (d-e, h-i).

Photoinhibition of SST-INs from Figure 4

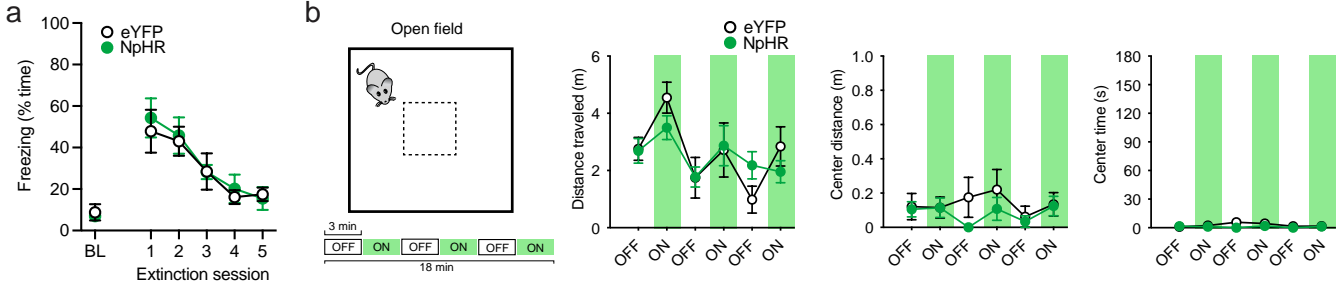

Photoexcitation of SST-INs from Figure 4

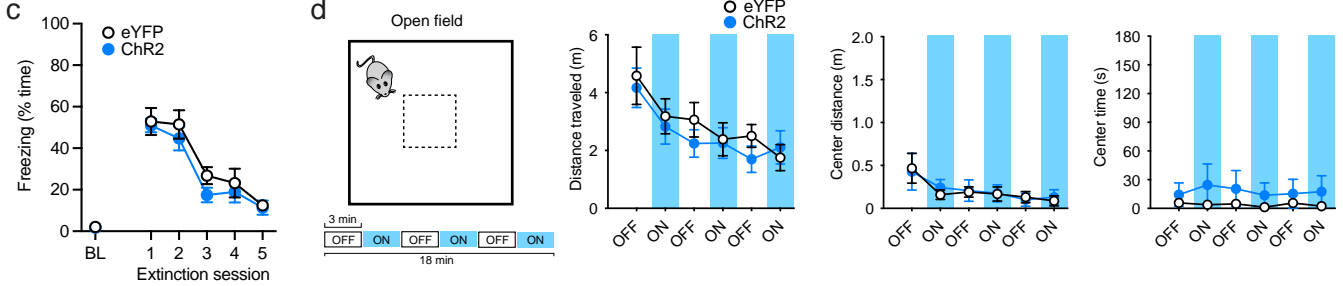

Photoexcitation of extinction-tagged SST-INs from Figure 5

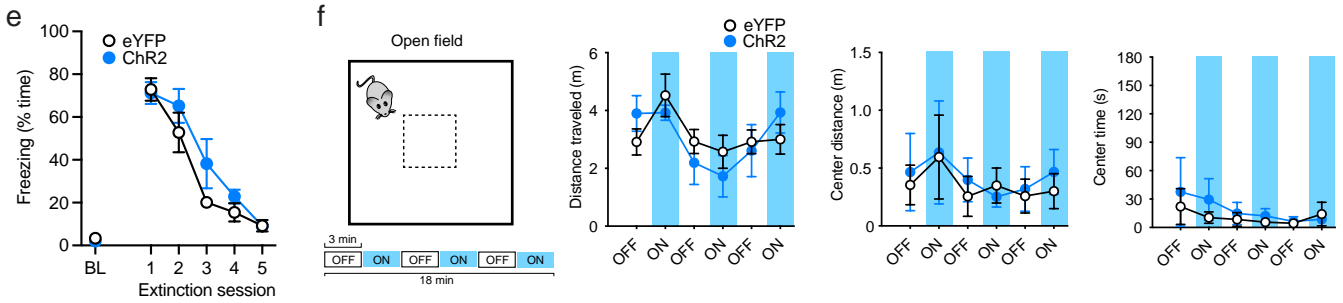

Photoexcitation of PV-INs from Figure 6

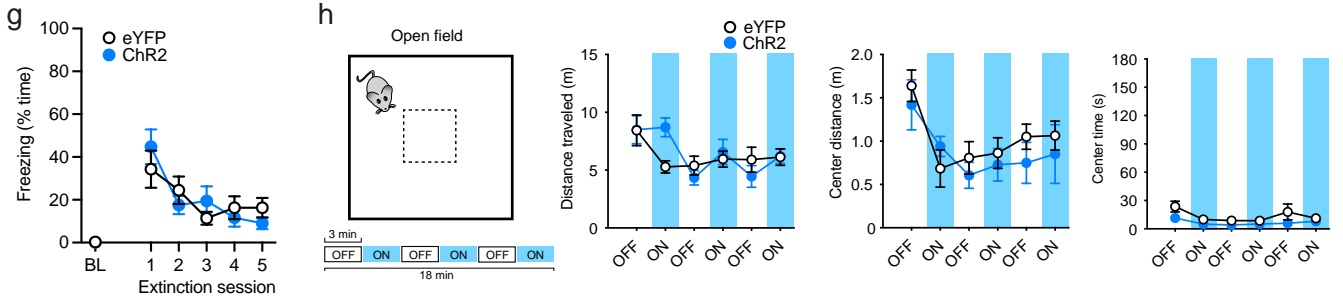

**Supplementary Figure 5. Extinction-related freezing and open field metrics for optogenetic manipulations of SST-INs, extinction-related SST-INs and PV-INs, related to Figs. 4-6. (a-b)** Additional analysis associated with photoinhibition of SST-INs in Fig. 4. of **(a)** freezing during the baseline period of the training session and first 3 min of each of the 5 extinction sessions, and **(b)** total distance traveled, center distance, and time in center from open field test. Photostimulation occurred in 3 min epochs beginning 3, 9, and 15 min into the 18 min test with light parameters identical to manipulations in fear conditioning contexts. **(c-d)** Analysis equivalent to that shown in **a-b** but associated with photoexcitation of SST-INs in Fig. 3. **(e-f)** Analysis equivalent to that shown in **a-b** but associated with photoexcitation of extinction-tagged SST-INs in Fig. 5. **(g-h)** Analysis equivalent to that shown in **a-b** but associated with photoexcitation of PV-INs in Fig. 6. **a-b**: eYFP:  $n = 6$ ; NpHR:  $n = 6$ . **c-d**: eYFP:  $n = 5$ ; ChR2:  $n = 4$ . **e-f**: eYFP:  $n = 5$ ; ChR2:  $n = 4$ . **g-h**: eYFP:  $n = 6$ ; ChR2:  $n = 6$ .

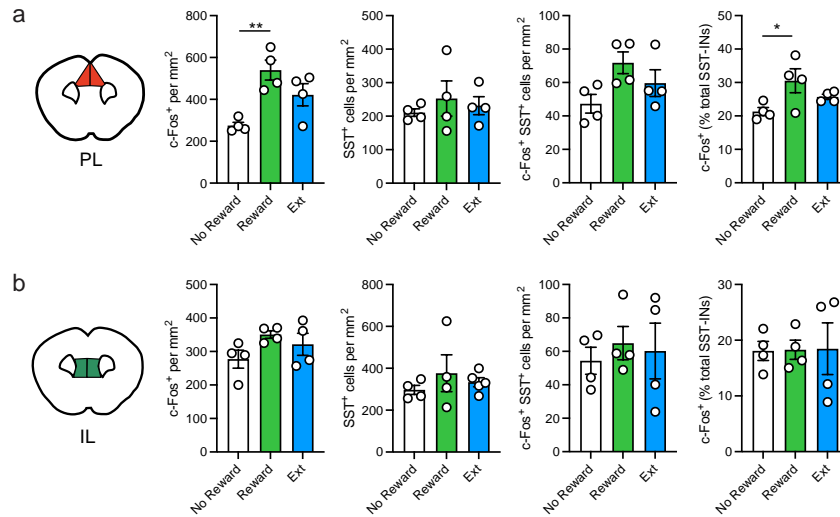

**Supplementary Figure 6. Additional analysis of SST-IN activation during retrieval of reward extinction, related to Fig. 7. (a-b)** c-Fos<sup>+</sup> cell density, SST-IN density, c-Fos<sup>+</sup> SST-IN density, and c-Fos<sup>+</sup> SST-INs (% total SST-INs) from (a) prelimbic cortex (PL) and (b) infralimbic cortex (IL) during retrieval of an extinguished contextual reward memory analyzed by one-way ANOVA. c-Fos<sup>+</sup> cells per mm<sup>2</sup>:  $F_{(2,9)} = 10.0$ ,  $p < 0.01$ . c-Fos<sup>+</sup> (% total SST-INs):  $F_{(2,9)} = 4.28$ ,  $p < 0.05$ . No Reward:  $n = 4$ ; Reward:  $n = 4$ ; Extinction:  $n = 4$ . \* -  $p < 0.05$ ; \*\* -  $p < 0.01$  by Tukey's post-hoc test.
